# Supplementary material for: Associations between “Cancer Risk”, “Inflammation” and “Metabolic Syndrome”: A Scoping Review
Source: MDPI journal article supplement (doi:10.3390/biology13050352), 2024-05-16
Supplement: s1 [file s1]

# Supplementary File S1. Search strings carried out for this scoping review.

| Database                                                                                                                                                                                                                                                                                                                                                                                                                                                                                                                                                                                                                                                                                                                                                                                                                                                                                                                                                                                                                                                                                                                                                                                                                                                                                                                                                                                                                                                                                                                                                                                                                                                                                                                                                                                                                                                                     | Results |
|------------------------------------------------------------------------------------------------------------------------------------------------------------------------------------------------------------------------------------------------------------------------------------------------------------------------------------------------------------------------------------------------------------------------------------------------------------------------------------------------------------------------------------------------------------------------------------------------------------------------------------------------------------------------------------------------------------------------------------------------------------------------------------------------------------------------------------------------------------------------------------------------------------------------------------------------------------------------------------------------------------------------------------------------------------------------------------------------------------------------------------------------------------------------------------------------------------------------------------------------------------------------------------------------------------------------------------------------------------------------------------------------------------------------------------------------------------------------------------------------------------------------------------------------------------------------------------------------------------------------------------------------------------------------------------------------------------------------------------------------------------------------------------------------------------------------------------------------------------------------------|---------|
| <b>PubMed</b><br>Search: (((Cancer risk) AND (Inflammation)) AND (Metabolic syndrome)) AND (Oncogenesis)) AND (Oxidative stress)<br>("cancer s"[All Fields] OR "cancerated"[All Fields] OR "canceration"[All Fields] OR "cancerization"[All Fields] OR "cancerized"[All Fields] OR "cancerous"[All Fields] OR "neoplasms"[MeSH Terms] OR "neoplasms"[All Fields] OR "cancer"[All Fields] OR "cancers"[All Fields]) AND ("risk"[MeSH Terms] OR "risk"[All Fields]) AND ("inflammation"[MeSH Terms] OR "inflammation"[All Fields] OR "inflammations"[All Fields] OR "inflammation s"[All Fields]) AND ("metabolic syndrome"[MeSH Terms] OR ("metabolic"[All Fields] AND "syndrome"[All Fields]) OR "metabolic syndrome"[All Fields]) AND ("carcinogenesis"[MeSH Terms] OR "carcinogenesis"[All Fields] OR "oncogenesis"[All Fields]) AND ("oxidative stress"[MeSH Terms] OR ("oxidative"[All Fields] AND "stress"[All Fields]) OR "oxidative stress"[All Fields])<br>Translations<br>Cancer: "cancer's"[All Fields] OR "cancerated"[All Fields] OR "canceration"[All Fields] OR "cancerization"[All Fields] OR "cancerized"[All Fields] OR "cancerous"[All Fields] OR "neoplasms"[MeSH Terms] OR "neoplasms"[All Fields] OR "cancer"[All Fields] OR "cancers"[All Fields]<br>risk: "risk"[MeSH Terms] OR "risk"[All Fields]<br>Inflammation: "inflammation"[MeSH Terms] OR "inflammation"[All Fields] OR "inflammations"[All Fields] OR "inflammation's"[All Fields]<br>Metabolic syndrome: "metabolic syndrome"[MeSH Terms] OR ("metabolic"[All Fields] AND "syndrome"[All Fields]) OR "metabolic syndrome"[All Fields]<br>Oncogenesis: "carcinogenesis"[MeSH Terms] OR "carcinogenesis"[All Fields] OR "oncogenesis"[All Fields]<br>Oxidative stress: "oxidative stress"[MeSH Terms] OR ("oxidative"[All Fields] AND "stress"[All Fields]) OR "oxidative stress"[All Fields] | 8       |
| <b>EMBASE</b><br>('cancer risk'/exp OR 'cancer risk') AND ('inflammation'/exp OR 'inflammation') AND ('metabolic syndrome'/exp OR 'metabolic syndrome') AND ('oncogenesis'/exp OR 'oncogenesis') AND ('oxidative stress'/exp OR 'oxidative stress')                                                                                                                                                                                                                                                                                                                                                                                                                                                                                                                                                                                                                                                                                                                                                                                                                                                                                                                                                                                                                                                                                                                                                                                                                                                                                                                                                                                                                                                                                                                                                                                                                          | 33      |
| <b>Scopus</b><br>“Cancer Risk” AND “Inflammation” AND “Metabolic syndrome” AND “Oncogenesis” AND “Oxidative Stress”                                                                                                                                                                                                                                                                                                                                                                                                                                                                                                                                                                                                                                                                                                                                                                                                                                                                                                                                                                                                                                                                                                                                                                                                                                                                                                                                                                                                                                                                                                                                                                                                                                                                                                                                                          | 2       |
| <b>Web of Science</b><br>cancer risk (All Fields) and inflammation (All Fields) and metabolic syndrome (All Fields) and oncogenesis (All Fields) and oxidative stress (All Fields)                                                                                                                                                                                                                                                                                                                                                                                                                                                                                                                                                                                                                                                                                                                                                                                                                                                                                                                                                                                                                                                                                                                                                                                                                                                                                                                                                                                                                                                                                                                                                                                                                                                                                           | 1       |
